# Supplementary material for: FePd nanowires modified with cyclodextrin as improved catalysts: effect of the alloy composition on colloidal stability and catalytic capacity
Source: Royal Society of Chemistry journal article supplement (doi:10.1039/d1cy02219a), 2022-01-01
Supplement: d1cy02219a1.pdf [file d1cy02219a1.pdf]

*Supplementary Information*

**FePd nanowires modified with cyclodextrin as improved catalysts: Effect of the alloy composition on colloidal stability and catalytic.**

Elisa Herrera,<sup>a,b</sup> Julieta Riva,<sup>c</sup> Soledad Aprea,<sup>c,d</sup> O. Fernando Silva,<sup>a,e</sup> Paula G. Bercoff<sup>c,d</sup> and Alejandro M. Granados<sup>\*a,e</sup>

---

<sup>a</sup> Universidad Nacional de Córdoba. Facultad de Ciencias Químicas. Departamento de Química Orgánica. Córdoba, Argentina.

<sup>b</sup> Consejo Nacional de Investigaciones Científicas y Técnicas, CONICET. Instituto Nacional del Agua, Subgerencia Centro de la Región Semiárida (INA-SCIRSA). Córdoba, Argentina.

<sup>c</sup> Universidad Nacional de Córdoba. Facultad de Matemática, Astronomía, Física y Computación.

<sup>d</sup> Instituto de Física Enrique Gaviola, IFEG. Consejo Nacional de Investigaciones Científicas y Técnicas, CONICET. Córdoba, Argentina.

<sup>e</sup> Consejo Nacional de Investigaciones Científicas y Técnicas, CONICET. Instituto de Investigaciones en Fisicoquímica de Córdoba, INFIQC. Córdoba, Argentina.

# 1. Energy Dispersive X-Ray Spectroscopy.

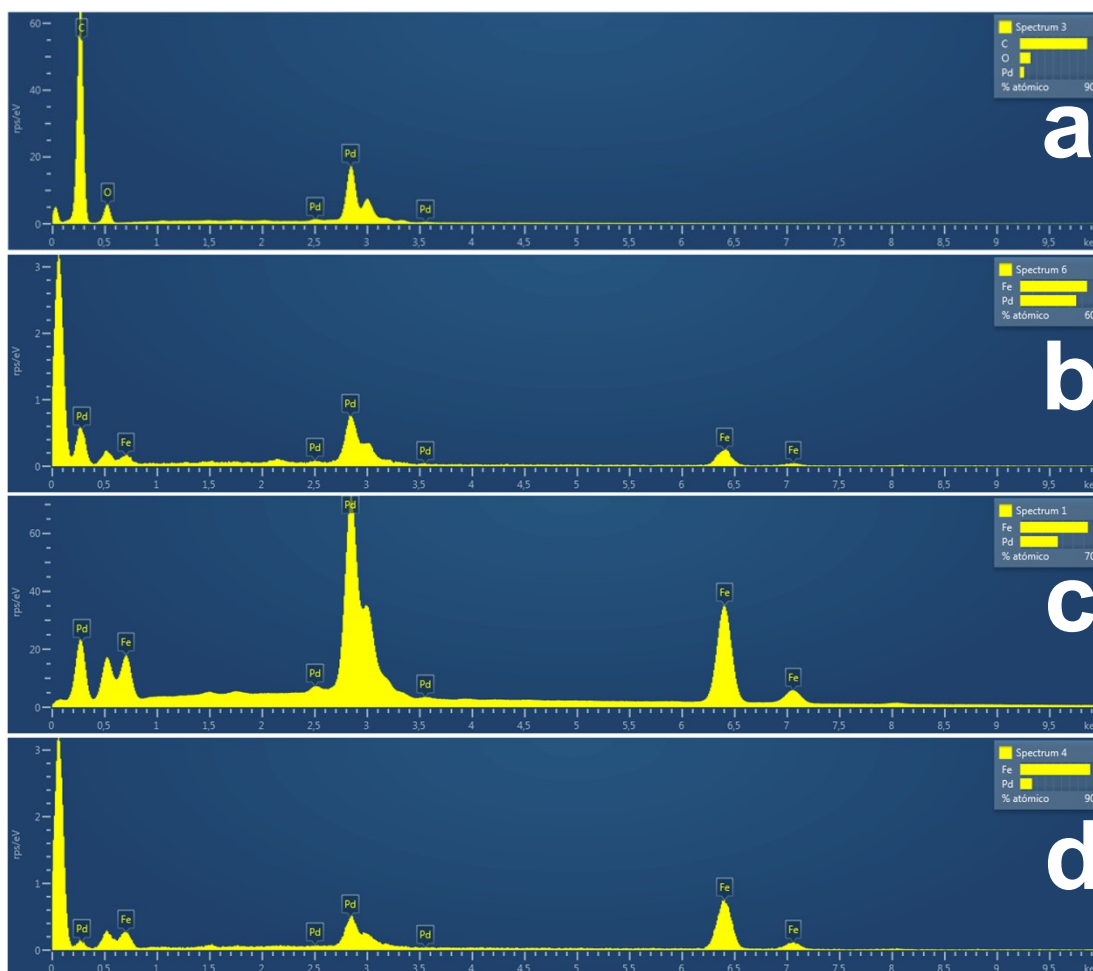

Figure S1.EDS spectra for FePd NWs of different composition. a) Pd b) Fe<sub>55</sub>Pd<sub>45</sub> c) Fe<sub>65</sub>Pd<sub>35</sub> d) and e) Fe<sub>85</sub>Pd<sub>15</sub>.

Table S1. Atomic % composition, calculated from XPS data.

| Element | Atomic% | Atomic% <sup>[a]</sup> |
|---------|---------|------------------------|
| C       | 15.9    |                        |
| Pd      | 30.0    | 35.6                   |
| Fe      | 54.1    | 64.4                   |

[a]

atomic % recalculated without considering C.

## 2. UV.vis measurements

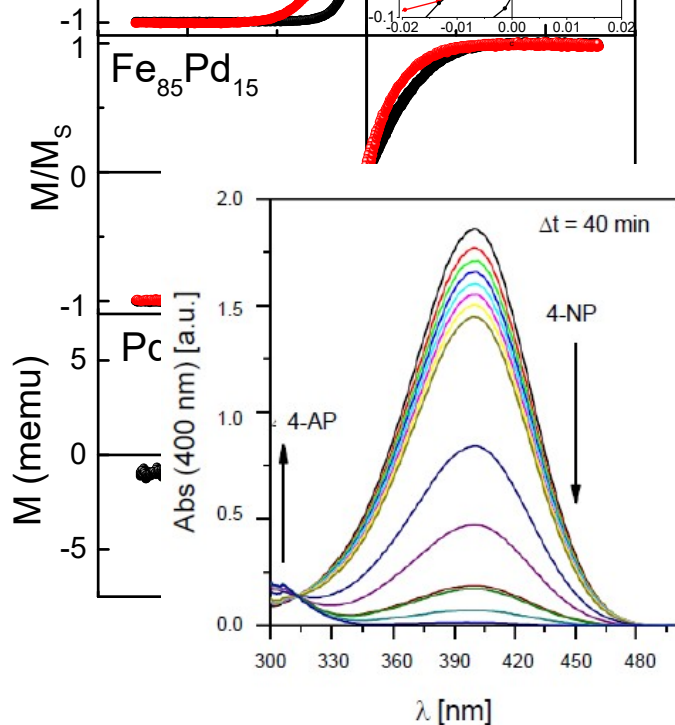

Figure S2. UV-vis spectra at different times of the reduction reaction of 4-NP  $10^{-4}$  M in aqueous solution containing  $\text{NaBH}_4$  0.1 M and FePd NWs@ $\beta$ CDMOD14

### 3. Catalytic studies

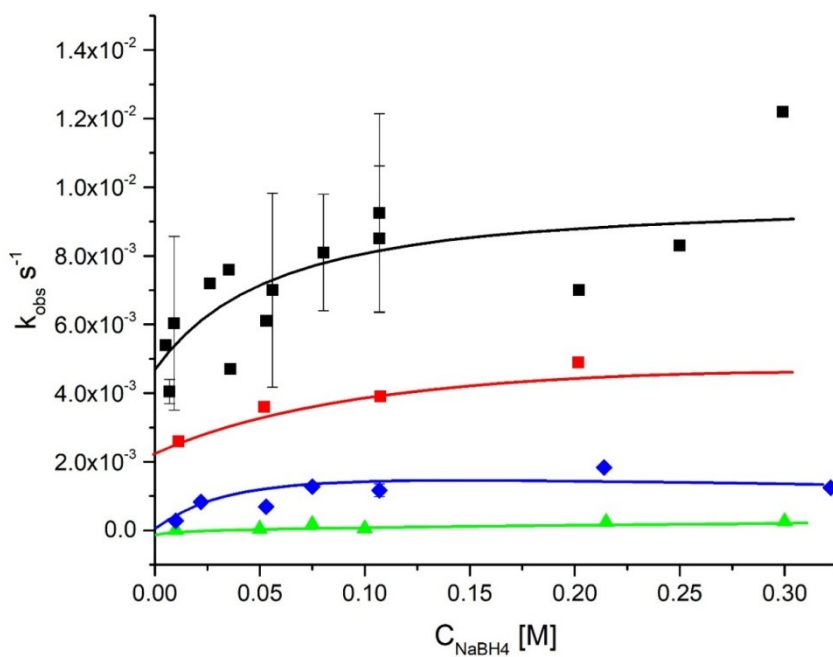

Figure S3.  $k_{\text{obs}}$  vs  $[\text{NaBH}_4]$  for reaction of 4-NP in presence of different alloys FePdNW@ $\beta$ CDMOD14. Fe<sub>55</sub>Pd<sub>45</sub> (black line), Fe<sub>65</sub>Pd<sub>35</sub> (red line), Pd (blue line) and Fe<sub>85</sub>Pd<sub>15</sub> (green line).

$$\theta_{4\text{-NP}} = \frac{(K_{4\text{-NP}} [4\text{-NP}]^r)}{1 + (K_{4\text{-NP}} [4\text{-NP}]^r) + (K_{\text{BH}_4^-} [\text{BH}_4^-])} \quad \text{Eq.S1}$$

$$\theta_{\text{BH}_4^-} = \frac{(K_{\text{BH}_4^-} [\text{BH}_4^-])}{1 + (K_{4\text{-NP}} [4\text{-NP}]^r) + (K_{\text{BH}_4^-} [\text{BH}_4^-])} \quad \text{Eq.S2}$$

### 3.a. The Taylor series expansion

The deduction of formula (Eq. 6) is as follows: According Eq. 5, we consider that  $k_{obs}$  is a function of [4-NP] variable and described by a rational function,  $\frac{f}{g}$ , Eq.S3:

$$k_{obs} = \frac{f}{g} = \frac{kSK_{4-NP}K_{BH_4^-} [BH_4^-]}{(1 + K_{4-NP} [4-NP] + K_{BH_4^-} [BH_4^-])^2} \quad \text{Eq.S3}$$

Where  $f$  and  $g$  are described by Eq. S4 and Eq.S5 respectively,

$$f = (kSK_{4-NP}K_{BH_4^-} [BH_4^-]) \quad \text{Eq.S4}$$

$$g = (1 + K_{4-NP} [4-NP] + K_{BH_4^-} [BH_4^-])^2 \quad \text{Eq.S5}$$

We use the Taylor expansion around [4-NP]=0 to obtain a linear approximation of Eq.S3 by truncating at the first-order (Eq. S6)

$$k_{obs} \approx k_{obs}(0) + \frac{\partial k_{obs}}{\partial [4-NP]}(0) \cdot [4-NP] \quad \text{Eq. S6}$$

Where the first derivate ( $\frac{\partial k_{obs}}{\partial [4-NP]}$ ) was obtained through the derivatives of rational function and according to the following rule (Eq.S7):

$$\frac{\partial k_{obs}}{\partial [4-NP]} = \frac{f' \cdot g - f \cdot g'}{g^2} \quad \text{Eq.S7}$$

Where  $f'$  and  $g'$  are the derivatives of  $f$  and  $g$  respectively and described by Eq. S8 and Eq. S9

$$f' = 0 \quad \text{Eq. S8}$$

$$g' = 2 \cdot K_{4-NP} \cdot (1 + K_{4-NP} [4-NP] + K_{BH_4^-} [BH_4^-]) \quad \text{Eq. S9}$$

If we substitute Eq. S4, S5, S8 and S9 into Eq. (S7) evaluated at [4-NP]=0, we obtained the slope of the linear approximation of Eq. S6 which is described by Eq. S10

$$\frac{\partial k_{obs}}{\partial [4-NP]}(0) = \frac{-2 \cdot k \cdot S \cdot (K_{4-NP})^2 \cdot (K_{BH_4^-} [BH_4^-])}{(1 + (K_{BH_4^-} [BH_4^-]))^3} = slope \quad \text{Eq.S10}$$

### 3.b. Determination of S.

The theoretical value of  $S$  (the total surface area of FePdNWs normalized to the solution's unit volume) was determined through the following equations. Geometrical parameters of cylindrical NWs (length and diameter), were obtained experimentally (see Table S1).

$$S_{NW} = 2\pi rh + 2\pi r^2$$

$$V_{NW} = \pi r^2 h$$

$$\rho_{Pd^0} = 12.02 \cdot 10^3 \frac{kg}{m^3}$$

$$\rho_{Fe^0} = 7.85 \cdot 10^3 \frac{kg}{m^3}$$

$$PM_{Pd^0} = 106.42 \text{ g/mol} \quad PM_{Fe^0} = 55.84 \text{ g/mol}$$

Where  $r=100\text{nm}$  is the NW radius, and  $L$  is their length (values in table S1),  $V_{NW}$  and  $S_{NW}$  are the volume and the surface of each individual NW, respectively,  $\rho_{Pd}$  and  $\rho_{Fe}$  are the density of  $Pd^0$  and  $Fe^0$ , respectively,  $PM_{Pd^0}$  and  $PM_{Fe^0}$  are the molar mass of  $Pd^0$  and  $Fe^0$ , respectively.

The density of each FePdNW composition ( $\rho_{Fe_{(100-x)}Pd_x}$ ), the individual mass ( $m_{NW}$ ), the total quantity ( $N$ ), the individual surface ( $S_{NW}$ ) and the surface in 'catalyst solution' ( $S_{cs}$ ) were calculated by using the follow equation and values obtained informed in Table S1.

$$\rho_{Fe_{(100-x)}Pd_x} = \frac{[\rho_{Fe} \cdot (100-x)] + [\rho_{Pd} \cdot x]}{100}$$

$$m_{NW} = \rho_{Fe_{(100-x)}Pd_x} \cdot V_{NW} \quad (\text{see Sec. 2.2})$$

$$S_{cs} = N \cdot S_{NW} / 2 \cdot 10^{-3} L$$

$$N = m_{NW} / m_{sample}$$

$$S_{cs} = S_{NW} / 2 \cdot 10^{-3} \quad \text{Finally, } S \text{ is the total surface which takes in account the dilution factor (50}\mu\text{L of NWs in 2.8mL)}$$

Table S2: Geometrical parameters and constants for the different NWs alloys

| Composition at%.                  | Length $L^a$ [ $\pm 2 \mu\text{m}$ ] | $V_{NW} \cdot 10^{-20}$ $\text{m}^3$ | $\rho \cdot 10^3$ $\text{kg/m}^3$ | $m_{NW} \cdot 10^{-12}$ g | m mg          | $N \cdot 10^8$ | $S_{NW} \cdot 10^{-12}$ $\text{m}^2$ | $S \cdot 10^{-3}$ $\text{m}^2 \cdot \text{L}^{-1}$ |
|-----------------------------------|--------------------------------------|--------------------------------------|-----------------------------------|---------------------------|---------------|----------------|--------------------------------------|----------------------------------------------------|
| Fe <sub>85</sub> Pd <sub>15</sub> | 8                                    | 25.1                                 | 7.85                              | 1.97                      | 1.0 $\pm$ 0.1 | 5.1            | 5.1                                  | 21                                                 |
| Fe <sub>65</sub> Pd <sub>35</sub> | 22                                   | 69.1                                 | 9.31                              | 6.43                      | 0.4 $\pm$ 0.1 | 0.6            | 13.9                                 | 7                                                  |
| Fe <sub>55</sub> Pd <sub>45</sub> | 13                                   | 40.8                                 | 9.73                              | 3.97                      | 0.8 $\pm$ 0.1 | 2.0            | 8.2                                  | 14                                                 |

Fe<sub>0</sub>Pd<sub>100</sub>

10

31.4

12.02

3.78

0.5±0.1

1.3

6.3

7

---
